# Supplementary material for: Moving beyond the age–depth model paradigm in deep-sea palaeoclimate archives: dual radiocarbon and stable isotope analysis on single foraminifera
Source: Copernicus journal article supplement (doi:10.5194/cp-14-515-2018), 2018-04-20
Supplement: Supplementary file 1 [file cp-14-515-2018-supplement.zip]

Archive with 3 entries (3 files):
- Table S1.xlsx
- cp-14-515-2018-supplement-title-page.pdf
- supplement S1, S2 and S3.pdf
