# Supplementary material for: Moving beyond the age–depth model paradigm in deep-sea palaeoclimate archives: dual radiocarbon and stable isotope analysis on single foraminifera
Source: Copernicus journal article supplement (doi:10.5194/cp-14-515-2018), 2018-04-20
Supplement: Supplementary file 1 [file cp-14-515-2018-supplement.zip › cp-14-515-2018-supplement-title-page.pdf]

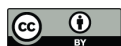

## *Supplement of*

# **Moving beyond the age–depth model paradigm in deep-sea palaeoclimate archives: dual radiocarbon and stable isotope analysis on single foraminifera**

**Bryan C. Lougheed et al.**

*Correspondence to:* Bryan C. Lougheed ([bryan.lougheed@lsce.ipsl.fr](mailto:bryan.lougheed@lsce.ipsl.fr))

- [cp-14-515-2018-supplement-title-page.pdf](#)
- [Table S1.xlsx](#)
- [supplement S1, S2 and S3.pdf](#)

The copyright of individual parts of the supplement might differ from the CC BY 4.0 License.
