# Supplementary material for: Moving beyond the age–depth model paradigm in deep-sea palaeoclimate archives: dual radiocarbon and stable isotope analysis on single foraminifera
Source: Copernicus journal article supplement (doi:10.5194/cp-14-515-2018), 2018-04-20
Supplement: Supplementary file 1 [file cp-14-515-2018-supplement.zip › Table S1.xlsx]

## Sheet: Sheet1
	Table S1. Analysis carried out on single foraminifera in core T86-10P
	Core depth interval		Species	14C analysed material	14C lab code	14C age	AMS	Stable isotope	δ18O	δ13C
	From (cm)	To (cm)				14C yr BP ±1σ	μg C	device	‰ V-PDB ±1σ	‰ V-PDB ±1σ
	0	1	C. wuellerstorfi	foraminifera test	ETH-71184.1	7680 ±100	21	Kiel Device	2.44 ±0.10	1.05 ±0.05
	0	1	C. wuellerstorfi	foraminifera test	ETH-71185.1	1160 ±80	15	-	-	-
	0	1	C. wuellerstorfi	foraminifera test	ETH-71186.1	2810 ±90	14	Kiel Device	0.65 ±0.10	0.88 ±0.05
	0	1	C. wuellerstorfi	-	-	-	-	GasBench	2.78 ±0.12	1.09 ±0.12
	1	2	C. wuellerstorfi	foraminifera test	ETH-71188.1	980 ±60	28	Kiel Device	2.18 ±0.10	0.5 ±0.05
	1	2	C. wuellerstorfi	foraminifera test	ETH-71189.1	3410 ±70	29	Kiel Device	2.52 ±0.10	0.82 ±0.05
	1	2	C. wuellerstorfi	foraminifera test	ETH-71190.1	2270 ±90	12	-	-	-
	1	2	C. wuellerstorfi	-	-	-	-	GasBench	2.56 ±0.12	1.00 ±0.12
	2	3	C. wuellerstorfi	-	-	-	-	GasBench	2.73 ±0.12	0.84 ±0.12
	3	4	C. wuellerstorfi	phosphoric acid leach	ETH-71138.2	2020 ±120	-	-	-	-
	3	4	C. wuellerstorfi	remaining test	ETH-71138.1	1790 ±70	47	-	-	-
	3	4	C. wuellerstorfi	foraminifera test	ETH-71139.1	9800 ±100	26	-	-	-
	3	4	C. wuellerstorfi	foraminifera test	ETH-71140.1	3470 ±100	14	-	-	-
	3	4	C. wuellerstorfi	foraminifera test	ETH-71141.1	2180 ±70	19	-	-	-
	3	4	C. wuellerstorfi	foraminifera test	ETH-71142.1	2490 ±80	15	-	-	-
	3	4	C. wuellerstorfi	-	-	-	-	GasBench	3.62 ±0.12	1.10 ±0.12
	4	5	C. wuellerstorfi	foraminifera test	ETH-71143.1	2490 ±90	12	-	-	-
	4	5	C. wuellerstorfi	foraminifera test	ETH-71144.1	2510 ±90	14	-	-	-
	4	5	C. wuellerstorfi	foraminifera test	ETH-71145.1	8510 ±110	19	Kiel Device	2.32 ±0.10	0.81 ±0.05
	4	5	C. wuellerstorfi	foraminifera test	ETH-71146.1	2020 ±70	22	Kiel Device	2.44 ±0.10	0.85 ±0.05
	4	5	C. wuellerstorfi	foraminifera test	ETH-71147.1	10640 ±110	25	Kiel Device	2.49 ±0.10	0.54 ±0.05
	4	5	C. wuellerstorfi	foraminifera test	ETH-71148.1	1750 ±90	14	-	-	-
	5	6	C. wuellerstorfi	-	-	-	-	GasBench	2.90 ±0.12	0.95 ±0.12
	6	7	C. wuellerstorfi	foraminifera test	ETH-71149.1	8300 ±100	23	Kiel Device	2.41 ±0.10	0.82 ±0.05
	6	7	C. wuellerstorfi	foraminifera test	ETH-71150.1	9480 ±100	30	Kiel Device	2.40 ±0.10	1.00 ±0.05
	6	7	C. wuellerstorfi	foraminifera test	ETH-71151.1	2970 ±110	9	-	-	-
	6	7	C. wuellerstorfi	foraminifera test	ETH-71152.1	1510 ±80	13	-	-	-
	6	7	C. wuellerstorfi	foraminifera test	ETH-71153.1	3400 ±100	10	-	-	-
	6	7	C. wuellerstorfi	foraminifera test	ETH-71154.1	6880 ±110	17	Kiel Device	2.53 ±0.10	1.13 ±0.05
	6	7	C. wuellerstorfi	foraminifera test	ETH-71155.1	4760 ±120	8	-	-	-
	6	7	C. wuellerstorfi	foraminifera test	ETH-71156.1	2850 ±60	29	-	-	-
	6	7	C. wuellerstorfi	foraminifera test	ETH-71157.1	3630 ±100	10	Kiel Device	2.33 ±0.10	0.97 ±0.05
	6	7	C. wuellerstorfi	-	-	-	-	GasBench	2.83 ±0.12	0.74 ±0.12
	7	8	C. wuellerstorfi	foraminifera test	ETH-71158.1	4310 ±70	32	Kiel Device	2.18 ±0.10	0.81 ±0.05
	7	8	C. wuellerstorfi	foraminifera test	ETH-71159.1	3090 ±120	15	-	-	-
	7	8	C. wuellerstorfi	foraminifera test	ETH-71160.1	9230 ±130	13	-	-	-
	7	8	C. wuellerstorfi	foraminifera test	ETH-71161.1	3620 ±90	13	-	-	-
	7	8	C. wuellerstorfi	foraminifera test	ETH-71162.1	3050 ±80	20	-	-	-
	7	8	C. wuellerstorfi	foraminifera test	ETH-71163.1	2170 ±90	13	-	-	-
	7	8	C. wuellerstorfi	foraminifera test	ETH-71164.1	2650 ±110	8	-	-	-
	7	8	C. wuellerstorfi	foraminifera test	ETH-71165.1	6670 ±110	12	-	-	-
	7	8	C. wuellerstorfi	-	-	-	-	GasBench	2.74 ±0.12	0.96 ±0.12
	8	9	C. wuellerstorfi	foraminifera test	ETH-71166.1	7570 ±90	24	Kiel Device	2.26 ±0.10	0.83 ±0.05
	8	9	C. wuellerstorfi	foraminifera test	ETH-71167.1	1830 ±80	17	Kiel Device	2.20 ±0.10	0.94 ±0.05
	8	9	C. wuellerstorfi	foraminifera test	ETH-71168.1	6410 ±110	13	-	-	-
	8	9	C. wuellerstorfi	-	-	-	-	GasBench	2.70 ±0.12	1.23 ±0.12
	9	10	C. wuellerstorfi	foraminifera test	ETH-71169.1	1710 ±70	29	Kiel Device	2.17 ±0.10	0.79 ±0.05
	9	10	C. wuellerstorfi	-	-	-	-	GasBench	2.81 ±0.12	0.98 ±0.12
	10	11	C. wuellerstorfi	foraminifera test	ETH-71170.1	2680 ±90	11	-	-	-
	10	11	C. wuellerstorfi	foraminifera test	ETH-71171.1	4880 ±100	12	-	-	-
	10	11	C. wuellerstorfi	foraminifera test	ETH-71172.1	8260 ±120	13	Kiel Device	2.63 ±0.10	0.88 ±0.05
	10	11	C. wuellerstorfi	-	-	-	-	GasBench	2.66 ±0.12	1.21 ±0.12
	11	12	C. wuellerstorfi	foraminifera test	ETH-71173.1	9970 ±120	16	Kiel Device	2.68 ±0.10	0.98 ±0.05
	11	12	C. wuellerstorfi	foraminifera test	ETH-71174.1	28440 ±720	10	-	-	-
	11	12	C. wuellerstorfi	foraminifera test	ETH-71175.1	9320 ±140	13	Kiel Device	5.06 ±0.10	0.43 ±0.05
	11	12	C. wuellerstorfi	foraminifera test	ETH-71176.1	9430 ±130	11	-	-	-
	11	12	C. wuellerstorfi	-	-	-	-	GasBench	3.14 ±0.12	0.77 ±0.12
	11	12	C. wuellerstorfi	-	-	-	-	GasBench	2.69 ±0.12	1.17 ±0.12
	12	13	C. wuellerstorfi	foraminifera test	ETH-71177.1	10800 ±110	29	-	-	-
	12	13	C. wuellerstorfi	foraminifera test	ETH-71178.1	8880 ±140	11	-	-	-
	12	13	C. wuellerstorfi	foraminifera test	ETH-71179.1	1980 ±80	14	-	-	-
	12	13	C. wuellerstorfi	-	-	-	-	GasBench	3.10 ±0.12	0.94 ±0.12
	12	13	C. wuellerstorfi	-	-	-	-	GasBench	2.97 ±0.12	0.89 ±0.12
	12	13	C. wuellerstorfi	-	-	-	-	GasBench	4.48 ±0.12	0.63 ±0.12
	13	14	C. wuellerstorfi	foraminifera test	ETH-71180.1	8820 ±100	31	Kiel Device	2.07 ±0.10	0.45 ±0.05
	13	14	C. wuellerstorfi	-	-	-	-	GasBench	2.78 ±0.12	0.88 ±0.12
	14	15	C. wuellerstorfi	phosphoric acid leach	ETH-71181.2	5050 ±150	-	-	-	-
	14	15	C. wuellerstorfi	remaining test	ETH-71181.1	5530 ±80	37	Kiel Device	2.30 ±0.10	0.88 ±0.05
	14	15	C. wuellerstorfi	foraminifera test	ETH-71182.1	9830 ±110	23	Kiel Device	2.54 ±0.10	0.71 ±0.05
	14	15	C. wuellerstorfi	foraminifera test	ETH-71183.1	9380 ±120	16	Kiel Device	2.64 ±0.10	0.92 ±0.05
	14	15	C. wuellerstorfi	-	-	-	-	GasBench	2.97 ±0.12	1.09 ±0.12
	15	16	C. wuellerstorfi	foraminifera test	ETH-71191.1	3410 ±70	33	Kiel Device	2.31 ±0.10	0.77 ±0.05
	15	16	C. wuellerstorfi	foraminifera test	ETH-71192.1	10890 ±120	28	-	-	-
	15	16	C. wuellerstorfi	phosphoric acid leach	ETH-71193.2	10480 ±200	-	-	-	-
	15	16	C. wuellerstorfi	remaining test	ETH-71193.1	10540 ±120	46	Kiel Device	2.52 ±0.10	0.38 ±0.05
	15	16	C. wuellerstorfi	foraminifera test	ETH-71194.1	9890 ±110	23	Kiel Device	2.47 ±0.10	0.49 ±0.05
	15	16	C. wuellerstorfi	foraminifera test	ETH-74928.1	8470 ±160	11	Kiel Device	2.75 ±0.10	1.17 ±0.05
	16	17	C. wuellerstorfi	foraminifera test	ETH-71195.1	9950 ±110	33	Kiel Device	2.67 ±0.10	0.78 ±0.05
	16	17	C. wuellerstorfi	foraminifera test	ETH-71196.1	9390 ±120	18	-	-	-
	17	18	C. wuellerstorfi	foraminifera test	ETH-74929.1	9600 ±120	16	Kiel Device	2.99 ±0.10	1.06 ±0.05
	18	19	C. wuellerstorfi	foraminifera test	ETH-71197.1	11990 ±130	31	-	-	-
	19	20	C. wuellerstorfi	foraminifera test	ETH-74930.1	10560 ±160	11	Kiel Device	2.86 ±0.10	0.72 ±0.05
	19	20	C. wuellerstorfi	foraminifera test	ETH-71198.1	10790 ±120	23	Kiel Device	2.57 ±0.10	0.61 ±0.05
	19	20	C. wuellerstorfi	foraminifera test	ETH-74931.1	32480 ±780	13	-	-	-
	20	21	C. wuellerstorfi	foraminifera test	ETH-71199.1	12360 ±150	16	-	-	-
	20	21	C. wuellerstorfi	foraminifera test	ETH-71200.1	10170 ±140	13	-	-	-
	20	21	C. wuellerstorfi	phosphoric acid leach	ETH-71201.2	12170 ±230	-	-	-	-
	20	21	C. wuellerstorfi	remaining test	ETH-71201.1	12160 ±130	36	Kiel Device	3.21 ±0.10	0.64 ±0.05
	20	21	C. wuellerstorfi	-	-	-	-	GasBench	3.04 ±0.12	1.03 ±0.12
	20	21	C. wuellerstorfi	-	-	-	-	GasBench	4.62 ±0.12	0.78 ±0.12
	20	21	C. wuellerstorfi	-	-	-	-	Kiel Device	4.51 ±0.10	0.75 ±0.05
	20	21	C. wuellerstorfi	-	-	-	-	GasBench	4.45 ±0.09	0.76 ±0.12
	20	21	C. wuellerstorfi	-	-	-	-	GasBench	2.85 ±0.09	0.51 ±0.12
	21	22	C. wuellerstorfi	foraminifera test	ETH-71202.1	10960 ±140	18	-	-	-
	21	22	C. wuellerstorfi	phosphoric acid leach	ETH-71203.2	2040 ±120	-	-	-	-
	21	22	C. wuellerstorfi	remaining test	ETH-71203.1	1910 ±70	36	Kiel Device	1.94 ±0.10	0.31 ±0.05
	21	22	C. wuellerstorfi	foraminifera test	ETH-74932.1	12300 ±140	20	-	-	-
	21	22	C. wuellerstorfi	foraminifera test	ETH-74933.1	16400 ±310	10	-	-	-
	21	22	C. wuellerstorfi	-	-	-	-	Kiel Device	3.68 ±0.10	1.04 ±0.05
	21	22	C. wuellerstorfi	-	-	-	-	Kiel Device	2.97 ±0.10	0.63 ±0.05
	21	22	C. wuellerstorfi	-	-	-	-	Kiel Device	3.72 ±0.10	1.05 ±0.05
	21	22	C. wuellerstorfi	-	-	-	-	Kiel Device	4.66 ±0.10	0.71 ±0.05
	21	22	C. wuellerstorfi	-	-	-	-	Kiel Device	4.17 ±0.10	0.86 ±0.05
	21	22	C. wuellerstorfi	-	-	-	-	GasBench	2.81 ±0.09	0.54 ±0.12
	22	23	C. wuellerstorfi	-	-	-	-	Kiel Device	3.19 ±0.10	0.71 ±0.05
	22	23	C. wuellerstorfi	-	-	-	-	Kiel Device	2.87 ±0.10	0.97 ±0.05
	22	23	C. wuellerstorfi	-	-	-	-	Kiel Device	3.69 ±0.10	0.96 ±0.05
	22	23	C. wuellerstorfi	-	-	-	-	GasBench	3.04 ±0.09	1.00 ±0.12
	24	25	C. wuellerstorfi	-	-	-	-	Kiel Device	3.51 ±0.10	0.77 ±0.05
	24	25	C. wuellerstorfi	-	-	-	-	GasBench	3.00 ±0.09	1.32 ±0.12
	25	26	C. wuellerstorfi	-	-	-	-	Kiel Device	3.38 ±0.10	1.04 ±0.05
	25	26	C. wuellerstorfi	-	-	-	-	GasBench	4.16 ±0.09	0.98 ±0.12
	26	27	C. wuellerstorfi	foraminifera test	ETH-74935.1	9630 ±200	10	-	-	-
	26	27	C. wuellerstorfi	foraminifera test	ETH-74936.1	12620 ±120	26	Kiel Device	3.59 ±0.10	1.13 ±0.05
	26	27	C. wuellerstorfi	-	-	-	-	Kiel Device	4.65 ±0.10	0.98 ±0.05
	26	27	C. wuellerstorfi	-	-	-	-	GasBench	2.08 ±0.09	1.23 ±0.12
	26	27	C. wuellerstorfi	-	-	-	-	GasBench	3.92 ±0.09	1.11 ±0.12
	26	27	C. wuellerstorfi	-	-	-	-	GasBench	4.71 ±0.09	0.96 ±0.12
	26	27	C. wuellerstorfi	-	-	-	-	GasBench	3.79 ±0.09	0.46 ±0.12
	27	28	C. wuellerstorfi	-	-	-	-	Kiel Device	3.63 ±0.10	1.10 ±0.05
	27	28	C. wuellerstorfi	-	-	-	-	Kiel Device	4.22 ±0.10	0.89 ±0.05
	27	28	C. wuellerstorfi	-	-	-	-	GasBench	4.71 ±0.09	0.85 ±0.12
	27	28	C. wuellerstorfi	-	-	-	-	GasBench	4.63 ±0.09	0.96 ±0.12
	27	28	C. wuellerstorfi	-	-	-	-	GasBench	4.33 ±0.09	1.31 ±0.12
	28	29	C. wuellerstorfi	-	-	-	-	Kiel Device	3.69 ±0.10	1.08 ±0.05
	28	29	C. wuellerstorfi	-	-	-	-	GasBench	3.77 ±0.09	1.04 ±0.12
	31	32	C. wuellerstorfi	-	-	-	-	Kiel Device	4.58 ±0.10	0.71 ±0.05
	31	32	C. wuellerstorfi	-	-	-	-	GasBench	4.51 ±0.08	0.67 ±0.08
	32	33	C. wuellerstorfi	foraminifera test	ETH-74938.1	16950 ±300	9	-	-	-
	32	33	C. wuellerstorfi	-	-	-	-	Kiel Device	4.54 ±0.10	0.72 ±0.05
	32	33	C. wuellerstorfi	-	-	-	-	GasBench	3.44 ±0.08	1.46 ±0.08
	32	33	C. wuellerstorfi	-	-	-	-	GasBench	4.03 ±0.09	0.42 ±0.12
	33	34	C. wuellerstorfi	foraminifera test	ETH-74937.1	34530 ±830	15	Kiel Device	3.83 ±0.10	0.69 ±0.05
	34	35	C. wuellerstorfi	foraminifera test	ETH-74939.1	19260 ±250	15	-	-	-
	34	35	C. wuellerstorfi	-	-	-	-	GasBench	3.58 ±0.08	0.98 ±0.08
	34	35	C. wuellerstorfi	-	-	-	-	GasBench	4.68 ±0.09	0.46 ±0.12
	34	35	C. wuellerstorfi	-	-	-	-	GasBench	4.07 ±0.09	1.24 ±0.12
	34	35	C. wuellerstorfi	-	-	-	-	GasBench	3.66 ±0.09	1.00 ±0.12
	37	38	C. wuellerstorfi	-	-	-	-	Kiel Device	3.94 ±0.10	1.03 ±0.05
	37	38	C. wuellerstorfi	-	-	-	-	Kiel Device	4.40 ±0.10	0.99 ±0.05
	37	38	C. wuellerstorfi	-	-	-	-	Kiel Device	4.19 ±0.10	1.01 ±0.05
	37	38	C. wuellerstorfi	-	-	-	-	GasBench	4.23 ±0.08	1.22 ±0.08
	37	38	C. wuellerstorfi	-	-	-	-	GasBench	3.94 ±0.08	1.22 ±0.08
	38	39	C. wuellerstorfi	foraminifera test	ETH-74940.1	35500 ±1300	7	Kiel Device	3.60 ±0.10	0.59 ±0.05
	40	41	C. wuellerstorfi	-	-	-	-	Kiel Device	4.25 ±0.10	1.23 ±0.05
	40	41	C. wuellerstorfi	-	-	-	-	GasBench	4.01 ±0.09	1.16 ±0.12
	40	41	C. wuellerstorfi	-	-	-	-	GasBench	4.15 ±0.09	1.08 ±0.12
	41	42	C. wuellerstorfi	foraminifera test	ETH-74941.1	7400 ±130	13	-	-	-
	41	42	C. wuellerstorfi	foraminifera test	ETH-74942.1	26860 ±570	12	-	-	-
	41	42	C. wuellerstorfi	foraminifera test	ETH-74943.1	30590 ±930	8	-	-	-
	41	42	C. wuellerstorfi	-	-	-	-	GasBench	4.21 ±0.08	1.10 ±0.08
	41	42	C. wuellerstorfi	-	-	-	-	GasBench	4.03 ±0.09	0.52 ±0.12
	41	42	C. wuellerstorfi	-	-	-	-	GasBench	3.89 ±0.09	1.15 ±0.12
	41	42	C. wuellerstorfi	-	-	-	-	GasBench	3.86 ±0.09	1.04 ±0.12
	41	42	C. wuellerstorfi	-	-	-	-	GasBench	4.04 ±0.09	1.05 ±0.12
	41	42	C. wuellerstorfi	-	-	-	-	GasBench	4.15 ±0.09	1.02 ±0.12
	42	43	C. wuellerstorfi	foraminifera test	ETH-74944.1	39120 ±960	34	Kiel Device	3.44 ±0.10	1.00 ±0.05
	42	43	C. wuellerstorfi	-	-	-	-	Kiel Device	4.22 ±0.10	0.97 ±0.05
	42	43	C. wuellerstorfi	-	-	-	-	Kiel Device	4.20 ±0.10	1.36 ±0.05
	42	43	C. wuellerstorfi	-	-	-	-	Kiel Device	4.17 ±0.10	1.28 ±0.05
	42	43	C. wuellerstorfi	-	-	-	-	GasBench	3.84 ±0.09	0.87 ±0.12
	42	43	C. wuellerstorfi	-	-	-	-	GasBench	3.90 ±0.09	1.02 ±0.12
	42	43	C. wuellerstorfi	-	-	-	-	GasBench	3.74 ±0.09	1.01 ±0.12
	46	47	C. wuellerstorfi	foraminifera test	ETH-74945.1	36900 ±1200	11	-	-	-
	46	47	C. wuellerstorfi	foraminifera test	ETH-74946.1	33600 ±1000	9	-	-	-
	46	47	C. wuellerstorfi	-	-	-	-	GasBench	4.10 ±0.08	1.28 ±0.08
	46	47	C. wuellerstorfi	-	-	-	-	GasBench	3.89 ±0.09	1.16 ±0.12
	46	47	C. wuellerstorfi	-	-	-	-	GasBench	3.98 ±0.09	0.62 ±0.12
	46	47	C. wuellerstorfi	-	-	-	-	GasBench	4.09 ±0.09	1.27 ±0.12
	46	47	C. wuellerstorfi	-	-	-	-	GasBench	4.07 ±0.09	1.35 ±0.12
	47	48	C. wuellerstorfi	foraminifera test	ETH-74947.1	36600 ±1100	12	-	-	-
	47	48	C. wuellerstorfi	-	-	-	-	Kiel Device	3.90 ±0.10	1.28 ±0.05
	47	48	C. wuellerstorfi	-	-	-	-	GasBench	1.97 ±0.09	1.83 ±0.12
	47	48	C. wuellerstorfi	-	-	-	-	GasBench	4.02 ±0.09	1.09 ±0.12
	47	48	C. wuellerstorfi	-	-	-	-	GasBench	4.01 ±0.09	1.05 ±0.12
	48	49	C. wuellerstorfi	-	-	-	-	Kiel Device	3.52 ±0.10	1.04 ±0.05
	48	49	C. wuellerstorfi	-	-	-	-	Kiel Device	3.97 ±0.10	1.28 ±0.05
	48	49	C. wuellerstorfi	-	-	-	-	GasBench	4.27 ±0.08	1.35 ±0.08
	53	54	C. wuellerstorfi	foraminifera test	ETH-71187.1	43400 ±3700	11	-	-	-
	53	54	C. wuellerstorfi	-	-	-	-	GasBench	3.69 ±0.12	1.41 ±0.12
	53	54	C. wuellerstorfi	-	-	-	-	GasBench	3.73 ±0.12	1.13 ±0.12
	73	74	C. wuellerstorfi	-	-	-	-	GasBench	3.98 ±0.12	1.19 ±0.12
	93	94	C. wuellerstorfi	-	-	-	-	GasBench	3.78 ±0.12	1.15 ±0.12
	113	114	C. wuellerstorfi	-	-	-	-	GasBench	3.61 ±0.12	1.21 ±0.12
	133	134	C. wuellerstorfi	-	-	-	-	GasBench	2.53 ±0.12	1.12 ±0.12
	133	134	C. wuellerstorfi	-	-	-	-	GasBench	2.63 ±0.12	0.92 ±0.12
	142	143	C. wuellerstorfi	-	-	-	-	GasBench	4.08 ±0.12	0.35 ±0.12
	142	143	C. wuellerstorfi	-	-	-	-	GasBench	3.83 ±0.12	0.83 ±0.12
	153	154	C. wuellerstorfi	-	-	-	-	GasBench	4.47 ±0.12	0.46 ±0.12
	153	154	C. wuellerstorfi	-	-	-	-	GasBench	4.41 ±0.12	0.87 ±0.12
